# Supplementary material for: STIM1 Knockout Enhances PDGF-Mediated Ca2+ Signaling through Upregulation of the PDGFR–PLCγ–STIM2 Cascade
Source: MDPI journal article supplement (doi:10.3390/ijms19061799), 2018-06-18
Supplement: s1 [file s1]

## Supplementary information

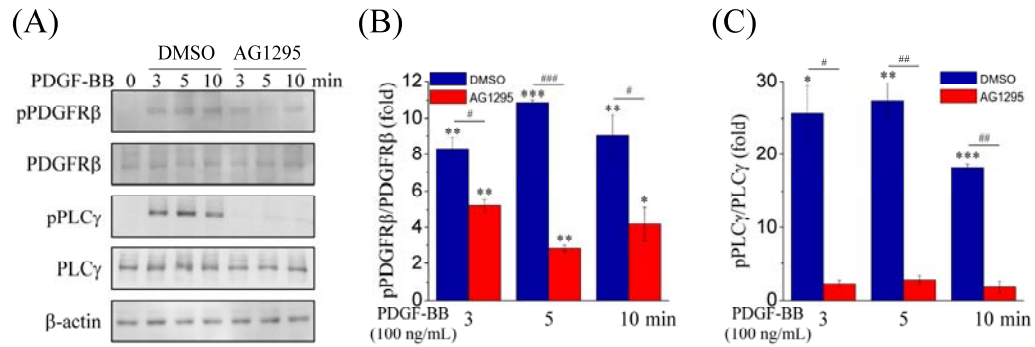

**Figure S1.** PDGFR inhibitor represses PDGF-BB-induced phosphorylation of PDGFR and PLCγ. MEF-STIM1<sup>-/-</sup> cells were starved in a serum-free medium for 12 h and then pretreated with 10 μM AG-1295 for 30 min. Cells were stimulated with 100 ng/mL PDGF-BB for 3, 5, and 10 min. Immunoblotting analysis using antibodies against phospho-PDGFRβ (pPDGFRβ), PDGFRβ, phospho-PLCγ (pPLCγ), and PLCγ. β-actin served as the internal control. (B and C) Quantification of proteins phosphorylation between DMSO and AG-1295 treatments. Relative intensities of the blots are presented as mean ± SEM from three independent experiments. Bar charts show phosphorylation levels of (B) pPDGFRβ and (C) pPLCγ normalized to the total protein. \*, #:  $P < 0.05$ ; \*\*, ##:  $P < 0.01$ ; \*\*\*, ###:  $P < 0.001$  by Student's *t*-test.

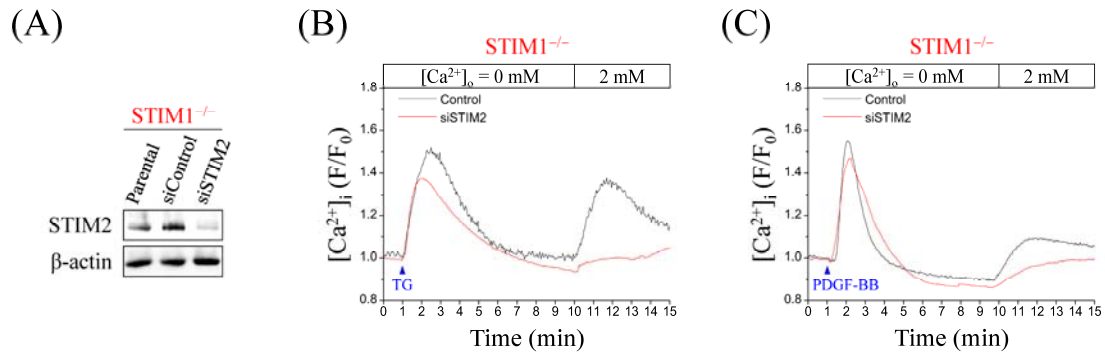

**Figure S2.** STIM2 knockdown attenuates SOCE in MEF-STIM1<sup>-/-</sup> cells. (A) Western blotting of STIM2 and  $\beta$ -actin was performed to evaluate the knockdown efficiency of scrambled siRNA (siControl) and STIM2 siRNA (siSTIM2) upon pre-treatment with siRNAs for 48 h in MEF-STIM1<sup>-/-</sup> cells. Representative tracings showing the effect of STIM2 knockdown in Fura-2/AM-loaded, serum-starved MEF-STIM1<sup>-/-</sup> cells in the absence of extracellular  $Ca^{2+}$  followed by addition of 2 mM  $Ca^{2+}$  to the extracellular buffer under stimulated with (B) thapsigargin (TG, 2  $\mu$ M) or (C) PDGF-BB (100 ng/mL). Intracellular  $Ca^{2+}$  ( $[Ca^{2+}]_i$ ) was monitored using a single-cell fluorimeter for 15 min. Each trace represents the mean from three independent experiments. Blue arrowheads indicate addition of TG or PDGF-BB at 1 min.

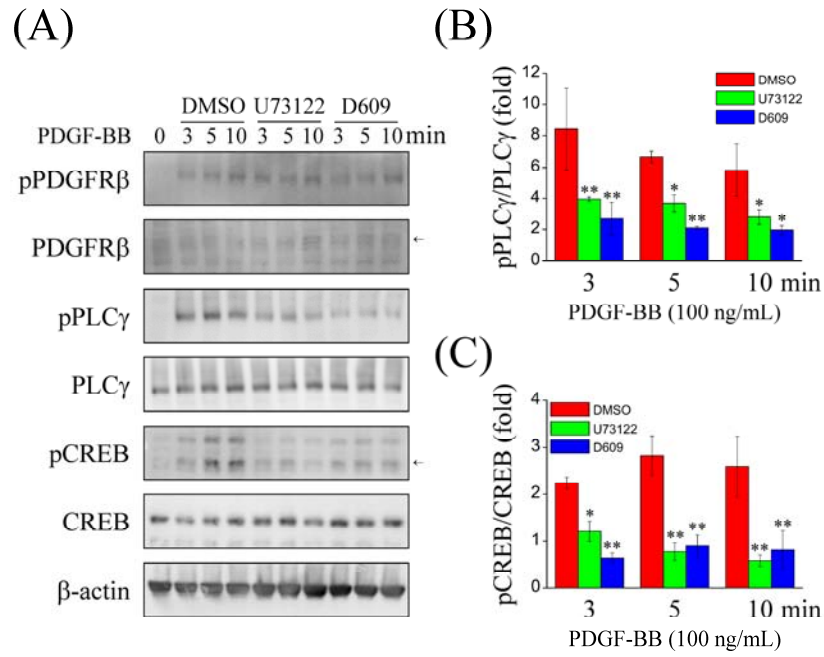

**Figure S3.** Inhibition of PDGF-BB-mediated PLC $\gamma$  activation using the PLC inhibitor. MEF-STIM1<sup>-/-</sup> cells were starved in a serum-free medium for 12 h and then pretreated with 10  $\mu$ M U73122 and 100 ng/mL D609 for 30 min. Cells were stimulated with 100 ng/mL PDGF-BB for 3, 5, and 10 min. Immunoblotting analysis using antibodies against phospho-PDGFR $\beta$  (pPDGFR $\beta$ ), PDGFR $\beta$ , phospho-PLC $\gamma$  (pPLC $\gamma$ ), PLC $\gamma$ , phospho-CREB (pCREB), and CREB.  $\beta$ -actin served as the internal control. (B and C) Quantification of protein phosphorylation between DMSO, U73122, and D609 treatments. Relative intensities of the blots are presented as mean  $\pm$  SEM from three independent experiments. Bar charts show phosphorylation levels of (B) pPLC $\gamma$  and (C) pCREB normalized to the total protein. \*:  $P < 0.05$ ; \*\*:  $P < 0.01$  by Student's  $t$ -test.

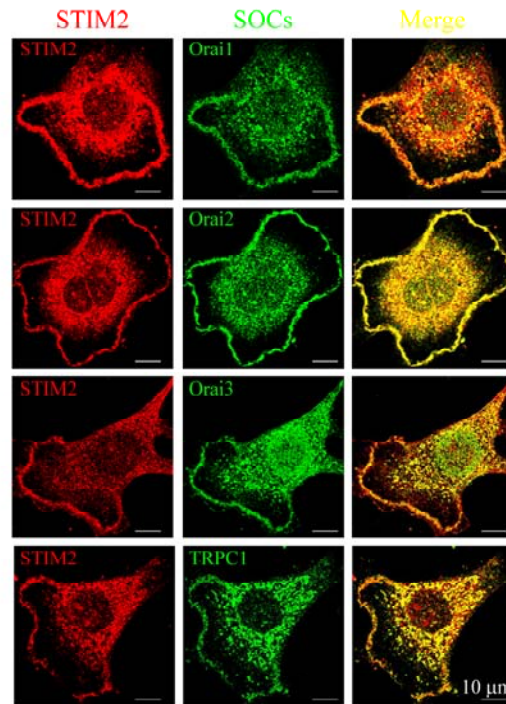

**Figure S4.** PDGF-BB induces interaction between STIM2 and SOCE-related channel proteins in MEF-STIM1<sup>-/-</sup> cells. Starved cells were treated with 100 ng/mL PDGF-BB for 5 min, and cells were fixed with 4% paraformaldehyde. Immunofluorescence staining was performed to label STIM2, Orai1, Orai2, Orai3, and TRPC1, and the fluorescence images were obtained using confocal microscopy. Scale bars = 10 μm.

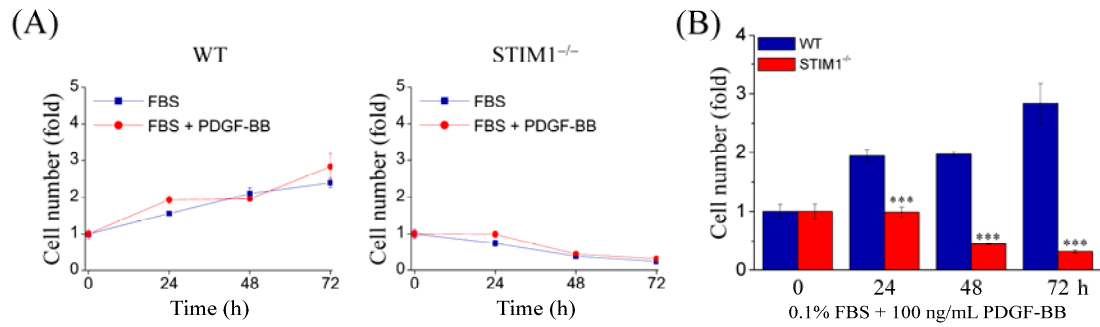

**Figure S5.** PDGF-BB does not affect MEF cell proliferation. (A) MEF-WT and MEF-STIM1<sup>-/-</sup> cells were starved in a serum-free medium for 12 h and then cultured in to DMEM with 0.1% FBS and with or without PDGF-BB (100 ng/mL) for 24, 48, and 72 h. Following fixation with 4% paraformaldehyde, cells were stained with Hoechst 33342. Fluorescence images were captured using an inverted fluorescence microscope. Cell counting was analyzed using ImageJ. Each point represents mean  $\pm$  SEM from three independent experiments. (B) Comparison of the effects of PDGF-BB on cell proliferation between MEF-WT and MEF-STIM1<sup>-/-</sup> cells in a medium containing 0.1% FBS. \*\*\*:  $P < 0.001$  by Student's *t*-test.

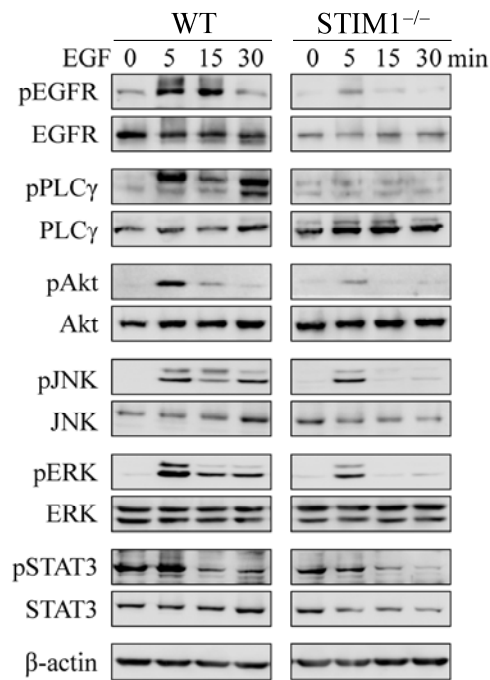

**Figure S6.** STIM1 knockout decreases phosphorylation of PLC $\gamma$ , Akt, JNK, and ERK, but not STAT3, under EGF stimulation. MEF-WT and MEF-STIM1<sup>-/-</sup> cells were starved in a serum-free medium for 12 h and then stimulated with 100 ng/mL EGF for 5, 15, and 30 min. Immunoblotting analysis using antibodies against phospho-EGFR (pEGFR), EGFR, phospho-PLC $\gamma$  (pPLC $\gamma$ ), PLC $\gamma$ , phospho-Akt (pAkt), Akt, phospho-JNK (pJNK), JNK, phospho-ERK (pERK), ERK, phospho-STAT3 (pSTAT3), and STAT3.  $\beta$ -actin served as the internal control.
